# Supplementary material
Source: publisher figshare collection journal article supplement (https://acs.figshare.com/ndownloader/files/12404783)
Supplement: Supplementary file 1 [file 12404783]

## Supporting Information

### Transition Metal Dihydride Monolayers: A New Family of Two-Dimensional Ferromagnetic Materials with Intrinsic Room-Temperature Half-Metallicity

Qisheng Wu<sup>†,‡</sup>, Yehui Zhang,<sup>†</sup> Qionghua Zhou,<sup>†</sup> Jinlan Wang<sup>†,§,\*</sup>, Xiao Cheng Zeng<sup>‡,\*</sup>

<sup>†</sup>School of Physics, Southeast University, Nanjing 211189, China

<sup>‡</sup>Department of Chemistry, University of Nebraska-Lincoln, Lincoln, Nebraska 68588, United States

<sup>§</sup>Synergetic Innovation Center for Quantum Effects and Applications (SICQEA), Hunan Normal University, Changsha, Hunan 410081, China

\*Correspondence should be addressed to: J. Wang ([jlwang@seu.edu.cn](mailto:jlwang@seu.edu.cn)) or X. C. Zeng ([xzengl@unl.edu](mailto:xzengl@unl.edu))

**Table S1.** Relative energies ( $meV/MH_2$ ) between ferromagnetic ( $FM$ ), three antiferromagnetic ( $AFM1$ ,  $AFM2$  and  $AFM3$ ) states, and nonmagnetic ( $NM$ ) states for  $MH_2$  ( $M=Sc, Ti, V, Cr, Fe, Co, Ni$ ) monolayers. Ground states are highlighted with yellow.

| System           | FM | AFM1   | AFM2   | AFM3   | NM     |
|------------------|----|--------|--------|--------|--------|
| ScH <sub>2</sub> | 0  | 40.5   | 58.5   | 31.6   | 104.1  |
| TiH <sub>2</sub> | 0  | -112.9 | -97.3  | -19.5  | 104.1  |
| VH <sub>2</sub>  | 0  | -365.1 | -357.8 | -198.1 | 718.6  |
| CrH <sub>2</sub> | 0  | -17.0  | -67.7  | 31.0   | 1360.3 |
| FeH <sub>2</sub> | 0  | -220.0 | -184.8 | -99.5  | 445.0  |
| CoH <sub>2</sub> | 0  | 151.0  | 342.5  | 57.3   | 764.0  |
| NiH <sub>2</sub> | 0  | -138.2 | -215.5 | 16.9   | 1.5    |

**Table S2.** Ground states (GS), magnetic moment ( $M$ ,  $\mu_B$ ) on metal atoms, average metal-hydrogen bond lengths ( $d_{M-H}$ ), metal-metal bond length ( $d_{M-M}$ ), charge ( $C$ ,  $e$ ), formation energies ( $E_{form}$ ), lattice parameters ( $Lattice$ ) and atomic fractional coordinates ( $Coordinates$ ) for  $MH_2$  ( $M=Sc, Ti, V, Cr, Fe, Co, Ni$ ) monolayers. FM, AFM1 and AFM2 denote a ferromagnetic and two antiferromagnetic states, respectively. SC, M, HM and QHM indicate semiconductor, metal, half-metal and quasi-half-metal, respectively.

| <i>System</i>          | <i>GS</i>  | <i>M</i> ( $\mu_B$ ) | <i>d<sub>M-H</sub></i> ( $\text{\AA}$ ) | <i>d<sub>M-M</sub></i> ( $\text{\AA}$ ) | <i>C</i> ( $e$ ) | <i>E<sub>form</sub></i> (eV/ $MH_2$ ) | <i>Lattice</i>                                                        | <i>Coordinates</i>                                                                                                                                                                                                                                                                                                                   |
|------------------------|------------|----------------------|-----------------------------------------|-----------------------------------------|------------------|---------------------------------------|-----------------------------------------------------------------------|--------------------------------------------------------------------------------------------------------------------------------------------------------------------------------------------------------------------------------------------------------------------------------------------------------------------------------------|
| <b>ScH<sub>2</sub></b> | FM<br>QHM  | 0.59                 | 2.05                                    | 3.19                                    | 1.58             | -5.30                                 | a = 3.19 $\text{\AA}$<br>b = 3.19 $\text{\AA}$<br>$\gamma = 60^\circ$ | Sc (0.333, 0.333, 0.392)<br>H (0.000, 0.000, 0.445)<br>H (0.667, 0.667, 0.339)                                                                                                                                                                                                                                                       |
| <b>TiH<sub>2</sub></b> | AFM1<br>SC | 1.24                 | 1.95                                    | 2.96                                    | 1.38             | -4.97                                 | a = 5.10 $\text{\AA}$<br>b = 2.96 $\text{\AA}$<br>$\gamma = 90^\circ$ | Ti (0.748, 0.269, 0.470)<br>Ti (0.248, 0.769, 0.470)<br>H (0.416, 0.272, 0.415)<br>H (0.916, 0.772, 0.415)<br>H (0.080, 0.266, 0.525)<br>H (0.580, 0.766, 0.525)                                                                                                                                                                     |
| <b>VH<sub>2</sub></b>  | AFM1<br>SC | 2.40                 | 1.89                                    | 2.82                                    | 1.20             | -4.65                                 | a = 4.77 $\text{\AA}$<br>b = 2.89 $\text{\AA}$<br>$\gamma = 90^\circ$ | V (0.745, 0.253, 0.533)<br>V (0.245, 0.753, 0.533)<br>H (0.409, 0.253, 0.472)<br>H (0.909, 0.753, 0.472)<br>H (0.082, 0.253, 0.593)<br>H (0.582, 0.753, 0.593)                                                                                                                                                                       |
| <b>CrH<sub>2</sub></b> | AFM2<br>SC | 3.52                 | 1.90                                    | 2.87                                    | 1.08             | -2.71                                 | a = 4.94 $\text{\AA}$<br>b = 5.76 $\text{\AA}$<br>$\gamma = 90^\circ$ | Cr (0.757, 0.134, 0.562)<br>Cr (0.257, 0.863, 0.562)<br>Cr (0.257, 0.363, 0.562)<br>Cr (0.757, 0.634, 0.562)<br>H (0.072, 0.149, 0.623)<br>H (0.572, 0.348, 0.623)<br>H (0.436, 0.084, 0.500)<br>H (0.936, 0.413, 0.500)<br>H (0.072, 0.649, 0.623)<br>H (0.572, 0.848, 0.623)<br>H (0.436, 0.584, 0.500)<br>H (0.936, 0.913, 0.500) |
| <b>FeH<sub>2</sub></b> | AFM1<br>SC | 3.02                 | 1.80                                    | 2.69                                    | 0.85             | -3.03                                 | a = 4.85 $\text{\AA}$<br>b = 2.57 $\text{\AA}$<br>$\gamma = 90^\circ$ | Fe (0.751, 0.273, 0.623)<br>Fe (0.251, 0.773, 0.623)<br>H (0.093, 0.273, 0.677)<br>H (0.593, 0.773, 0.677)<br>H (0.409, 0.273, 0.569)<br>H (0.909, 0.773, 0.569)                                                                                                                                                                     |
| <b>CoH<sub>2</sub></b> | FM<br>HM   | 1.19                 | 1.71                                    | 2.53                                    | 0.55             | -3.49                                 | a = 2.53 $\text{\AA}$<br>b = 2.53 $\text{\AA}$<br>$\gamma = 60^\circ$ | Co (0.333, 0.333, 0.625)<br>H (0.000, 0.000, 0.677)<br>H (0.667, 0.667, 0.572)                                                                                                                                                                                                                                                       |
| <b>NiH<sub>2</sub></b> | AFM2<br>SC | 1.17                 | 1.73                                    | 2.57                                    | 0.62             | -3.41                                 | a = 4.43 $\text{\AA}$<br>b = 5.14 $\text{\AA}$<br>$\gamma = 90^\circ$ | Ni (0.745, 0.115, 0.508)<br>Ni (0.245, 0.873, 0.508)<br>Ni (0.245, 0.373, 0.508)<br>Ni (0.745, 0.615, 0.508)<br>H (0.083, 0.134, 0.568)<br>H (0.583, 0.354, 0.568)<br>H (0.407, 0.134, 0.449)<br>H (0.906, 0.354, 0.449)<br>H (0.083, 0.634, 0.567)<br>H (0.583, 0.854, 0.567)<br>H (0.407, 0.634, 0.449)<br>H (0.907, 0.854, 0.449) |

**Table S3.** Relative energies between T and H phases for 2D MH<sub>2</sub> (M=Sc, Ti, V, Cr, Fe, Co, Ni) monolayers with ferromagnetic ground states.  $E_T$  and  $E_H$  indicate the total energy for the T and H phases of MH<sub>2</sub> monolayers, respectively.

| System           | $E_H-E_T$ (eV/MH <sub>2</sub> ) |
|------------------|---------------------------------|
| ScH <sub>2</sub> | 0.025                           |
| TiH <sub>2</sub> | 0.239                           |
| VH <sub>2</sub>  | 0.734                           |
| CrH <sub>2</sub> | 0.595                           |
| FeH <sub>2</sub> | 0.520                           |
| CoH <sub>2</sub> | 0.745                           |
| NiH <sub>2</sub> | 1.238                           |

**Table S4.** Magnetic anisotropy energies in  $\mu\text{eV}/\text{MH}_2$  of different directions compared with (001) direction for CoH<sub>2</sub> and ScH<sub>2</sub> monolayers, respectively.

| System           | E(100)-E(001) | E(010)-E(001) | E(110)-E(001) | E(111)-E(001) |
|------------------|---------------|---------------|---------------|---------------|
| CoH <sub>2</sub> | -442.6        | -442.1        | -442.8        | -300.3        |
| ScH <sub>2</sub> | 20.4          | 20.4          | 20.4          | 13.7          |

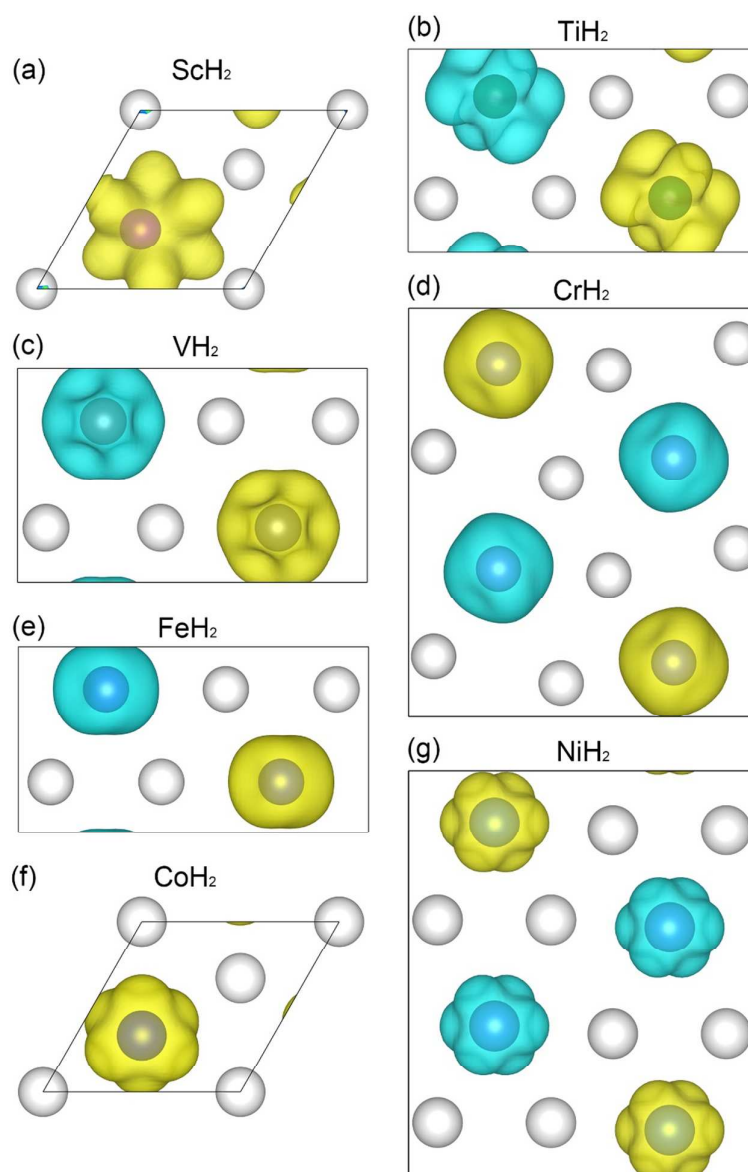

**Figure S1.** Spin densities for  $\text{ScH}_2$  (a),  $\text{TiH}_2$  (b),  $\text{VH}_2$  (c),  $\text{CrH}_2$  (d),  $\text{FeH}_2$  (e),  $\text{CoH}_2$  (f), and  $\text{NiH}_2$  (g) monolayers. Colored and white spheres denote transition-metal and hydrogen atoms, respectively. Yellow and blue areas indicate spin up and spin down, respectively. Black lines indicate primitive cells.

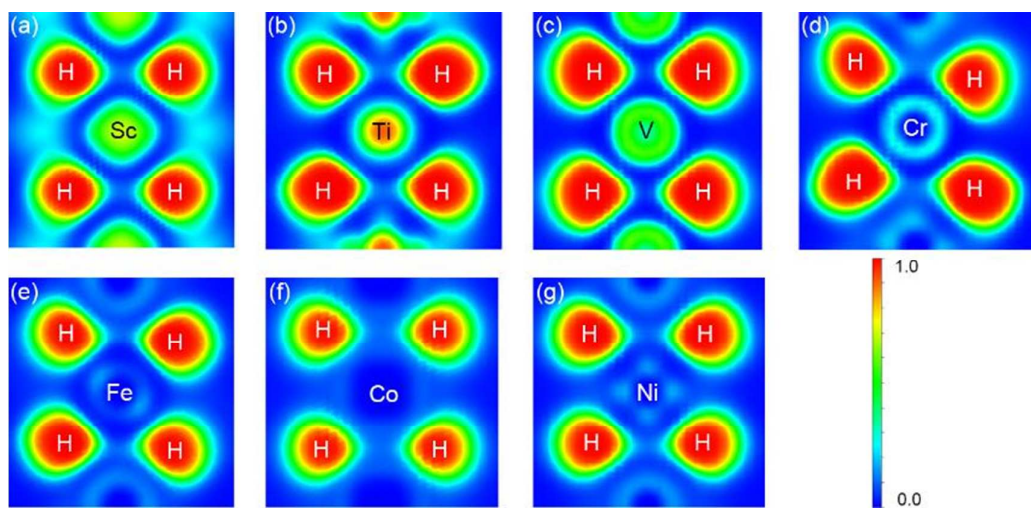

**Figure S2.** Electron localization functions (ELF) for  $\text{ScH}_2$  (a),  $\text{TiH}_2$  (b),  $\text{VH}_2$  (c),  $\text{CrH}_2$  (d),  $\text{FeH}_2$  (e),  $\text{CoH}_2$  (f), and  $\text{NiH}_2$  (g) monolayers. Transition metal and hydrogen atoms are annotated accordingly.

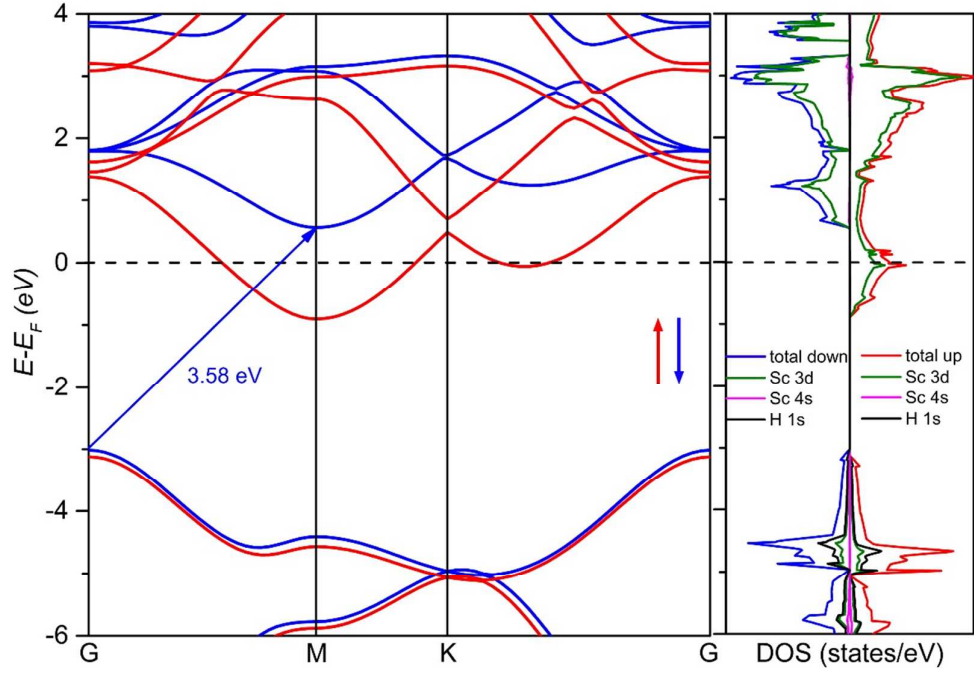

**Figure S3.** Spin-polarized band structures and projected density of states (DOS) for ScH<sub>2</sub> monolayer doping with -0.5 $e$ . Red and blue lines represent spin-up and spin-down parts, respectively. Dashed line denotes the Fermi level set to zero.

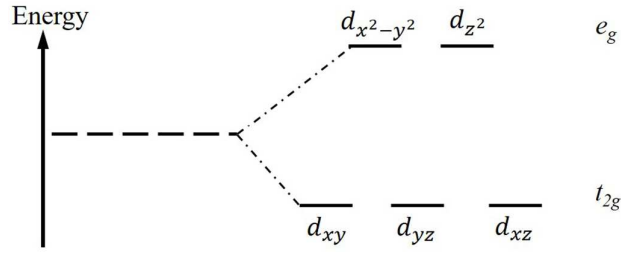

**Figure S4.** Energy diagram for an octahedral crystal field.

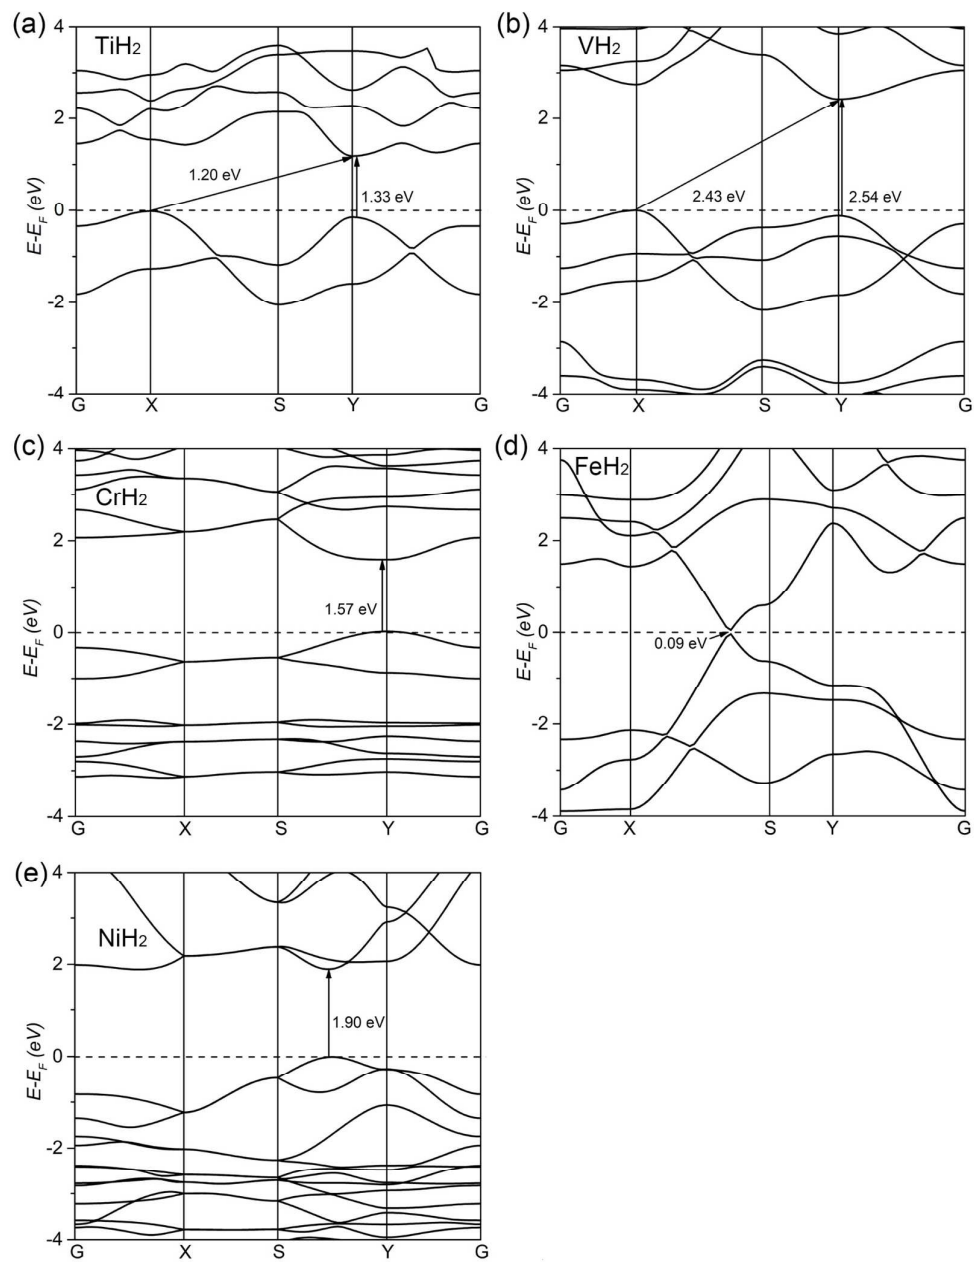

**Figure S5.** Computed band structures based on the HSE06 functional for  $\text{TiH}_2$  (a),  $\text{VH}_2$  (b),  $\text{CrH}_2$  (c),  $\text{FeH}_2$  (d), and  $\text{NiH}_2$  (e) monolayers.

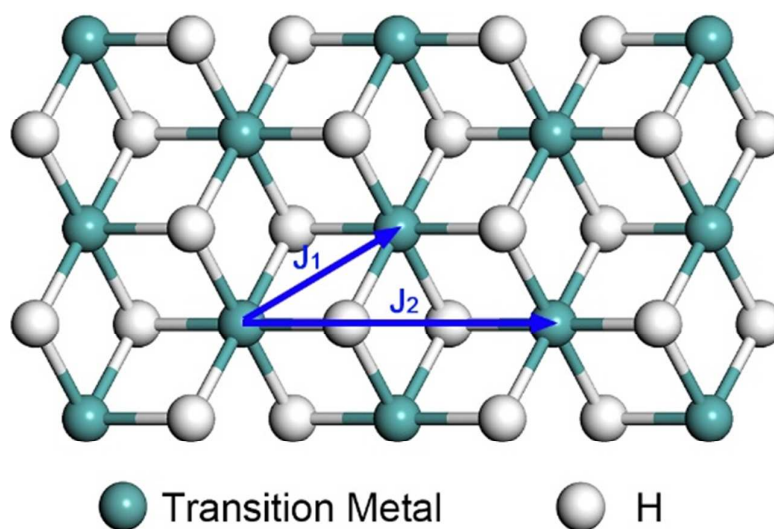

**Figure S6.** Spin configuration for estimating the exchange-interaction constants.  $J_1$  and  $J_2$  are the nearest and next nearest magnetic exchange interaction parameters, respectively.



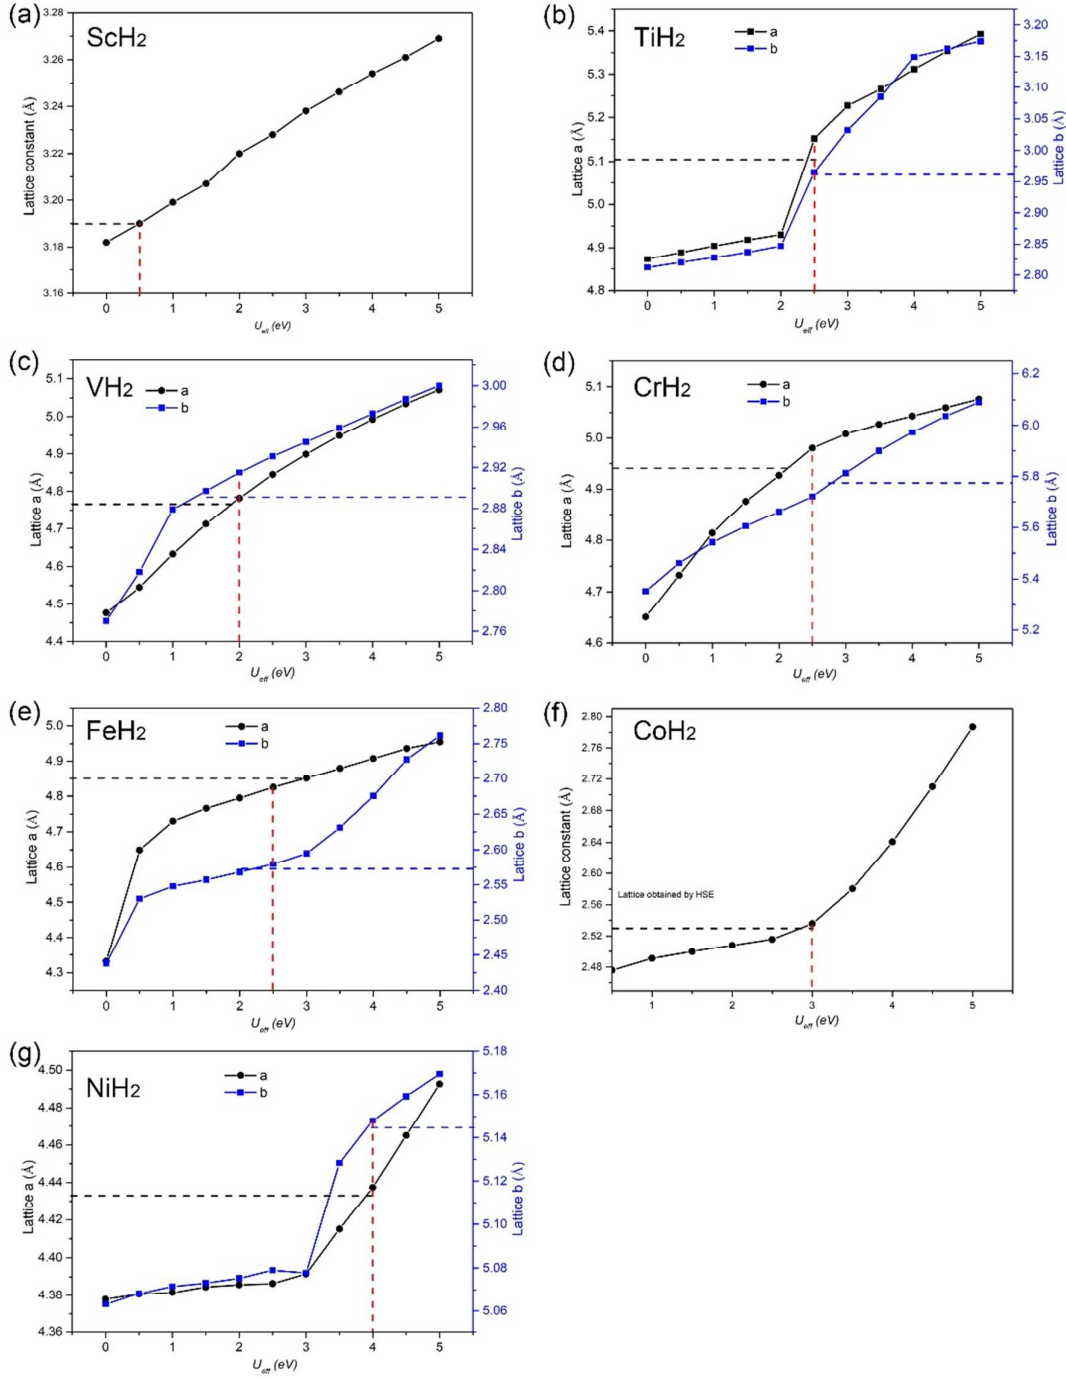

**Figure S7.** Test on various  $U$  values, compared with the results at HSE06 level for ScH<sub>2</sub> (a), TiH<sub>2</sub> (b), VH<sub>2</sub> (c), CrH<sub>2</sub> (d), FeH<sub>2</sub> (e), CoH<sub>2</sub> (f), and NiH<sub>2</sub> (g) monolayers. Solid lines denote lattice constants calculated using  $GGA+U$  method. Black and blue dashed lines indicate constants calculated at HSE06 level, respectively. Red dashed lines mark the  $U$  values used in phonon dispersion calculations and *ab initio* molecular dynamics simulations.

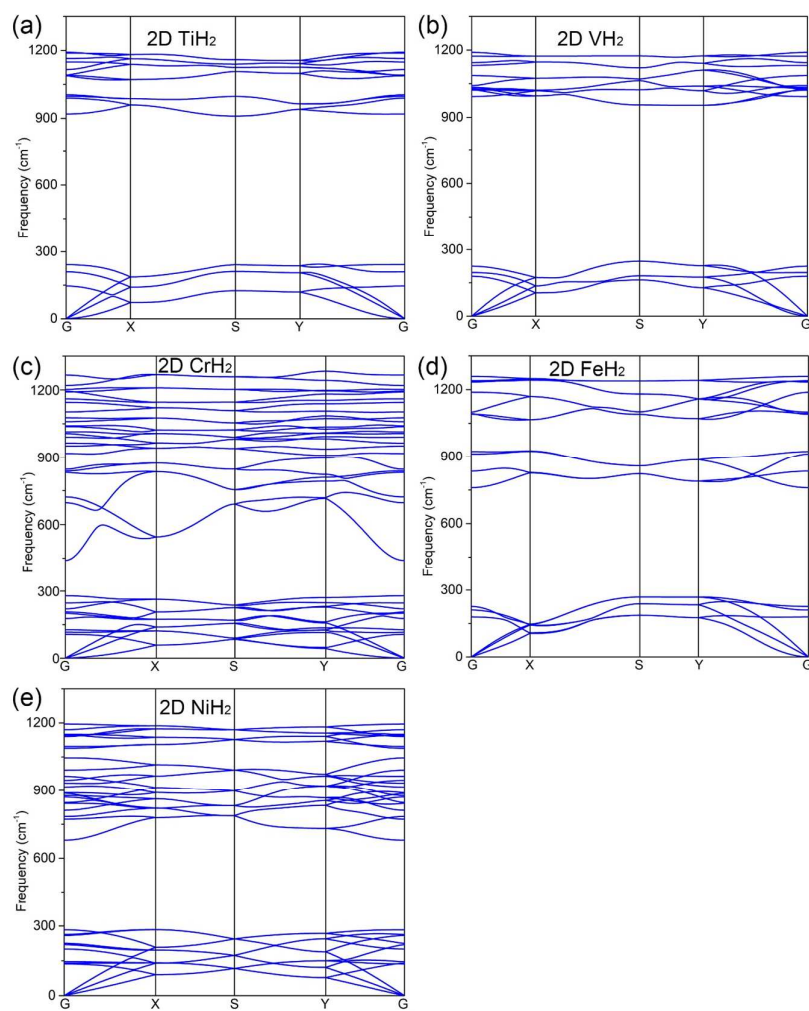

**Figure S8.** Phonon dispersion spectra for  $\text{TiH}_2$  (a),  $\text{VH}_2$  (b),  $\text{CrH}_2$  (c),  $\text{FeH}_2$  (d) and  $\text{NiH}_2$  (e) monolayers.

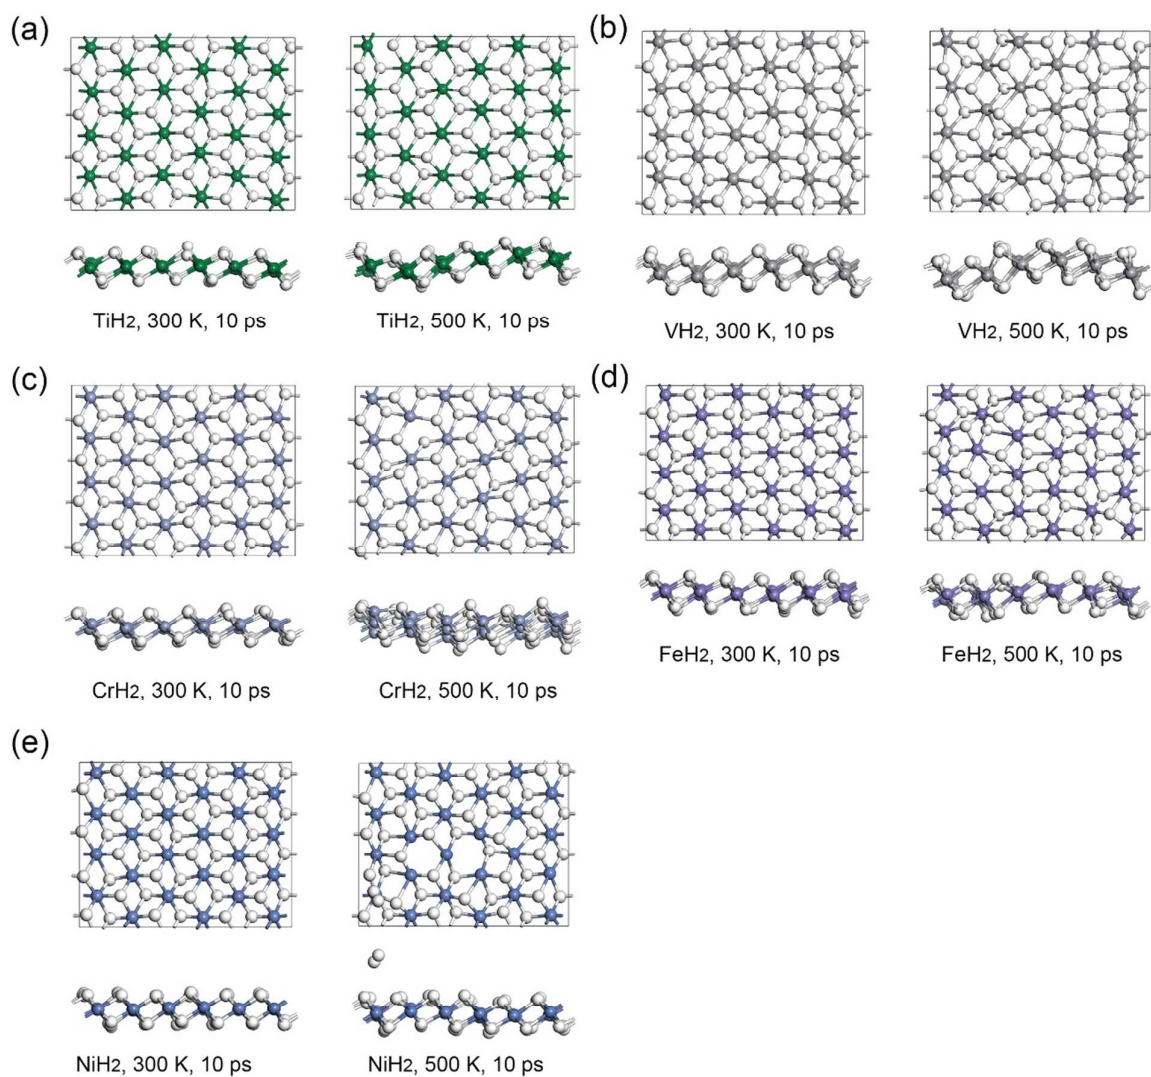

**Figure S9.** *Ab initio* molecular dynamics (AIMD) snapshots (top and side views) of TiH<sub>2</sub> (a), VH<sub>2</sub> (b), CrH<sub>2</sub> (c), FeH<sub>2</sub> (d) and NiH<sub>2</sub> (e) monolayers, after 10 ps run at 300 K and 500 K, respectively.

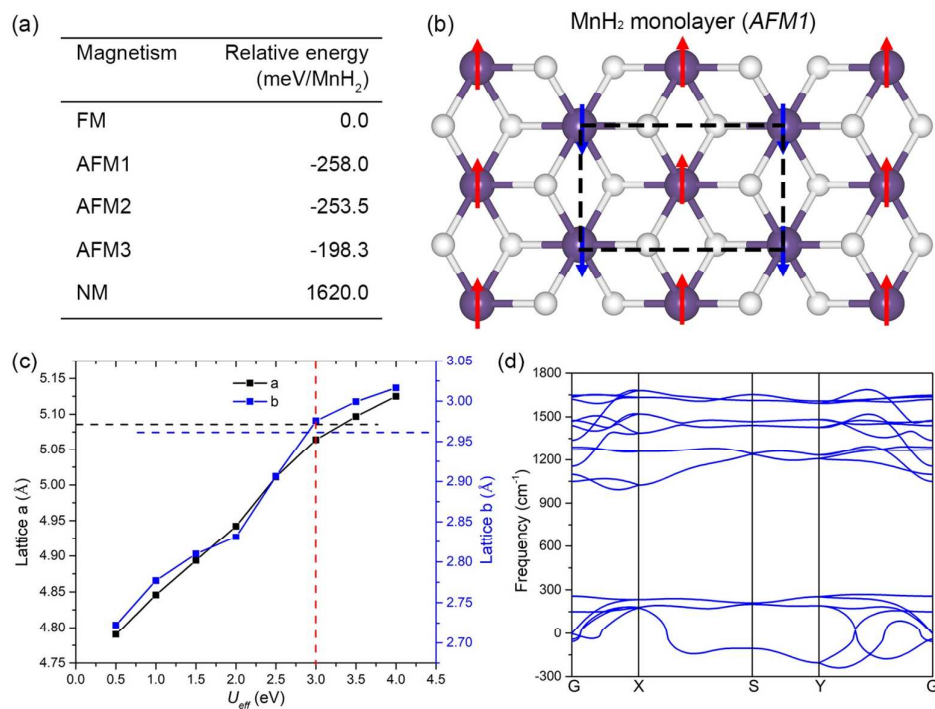

**Figure S10.** (a) Relative energies between different magnetic states for MnH<sub>2</sub> monolayer. AFM1 is the ground state for MnH<sub>2</sub> monolayer. (b) The geometric structure for MnH<sub>2</sub> monolayer. Red and blue arrows denote spin up and down, respectively. Black dashed lines indicate unit cell. (c) Test on various  $U$  values, compared with the results at HSE06 level for MnH<sub>2</sub> monolayer. Solid lines denote lattice constants calculated using GGA+ $U$  method. Black and blue dashed lines indicate constants calculated at HSE06 level, respectively. Red dashed lines mark the  $U$  value used in phonon dispersion calculations. (d) Phonon dispersions for MnH<sub>2</sub> monolayer. The existence of large imaginary frequencies suggest that MnH<sub>2</sub> monolayer is unstable.
